# Supplementary material for: Comparison of Direct and Video Laryngoscopes during Different Airway Scenarios Performed by Experienced Paramedics: A Randomized Cross‐Over Manikin Study
Source: Hindawi journal article supplement (doi:10.1155/2020/5382739), 2020-01-01

# Supplementary figure 1. Median POGO score.

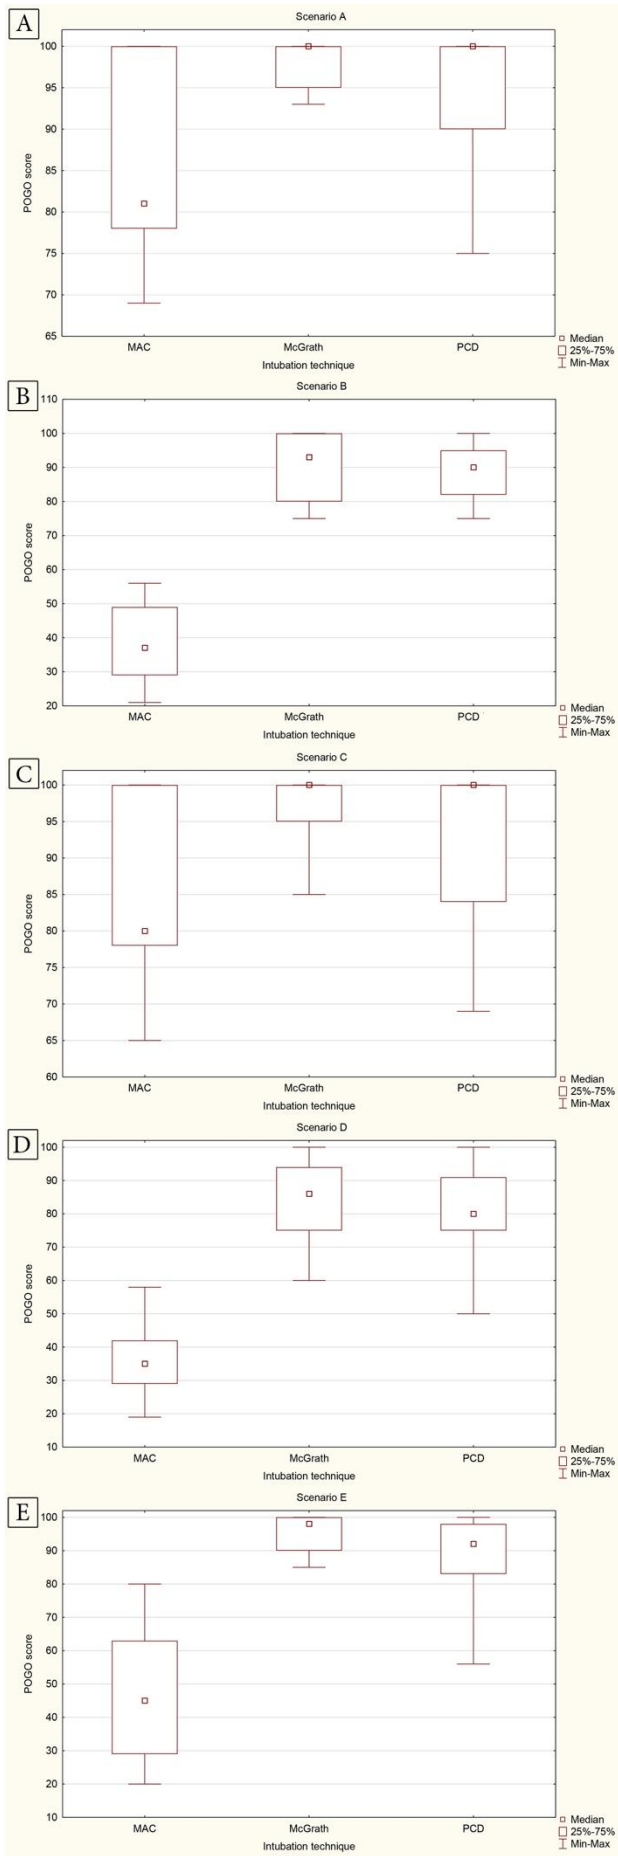

Supplement: f1 [file 5382739.f1.pdf]
